# Supplementary material for: Co-Sputtered CuNi Heteroatomic Electrocatalyst For Enhance 5-Hydroxymethylfurfural Selective Electrochemical Conversion
Source: Research Square preprint supplement (doi:10.21203/rs.3.rs-7714831/v1), 2025-10-30
Supplement: Supplementary file 1 [file 8e39f37fc305aabf6a0de5f4.docx]

**SI Files**

**Co-Sputtered CuNi Heteroatomic Electrocatalyst For Enhance 5-Hydroxymethylfurfural Selective Electrochemical Conversion**

*Moumita Dikshita#, Baleeswaraiah Muchharlab#, Luz Vazquez Rivera b , Kapil Kumara, Sunita Sanwariac, Kishor Kumar Sadasivunid, Abdennaceur Karouib, Sandeep Kumare. Adetayo Adedejib, Bijandra Kumarb**

*a Laboratory of Environmental Sustainability and Energy Research (LESER), National Institute of Technology Delhi, New Delhi,* *110036 India*

*b* *Department of Math. Comp. Science and Eng. Technology, Elizabeth City State University, Elizabeth City, NC 27909 USA*

*c Government Nagarjuna Post Graduate College of Science, Raipur 492010, Chhattisgarh, India*

*d Center for Advanced Materials, Qatar University, PO Box 2713, Doha, Qatar*

*e Biomass Research Laboratory (BRL), Old Dominion University, Norfolk, VA, United States*

*# equal contributions*

**Co-Sputtered CuNi Heteroatomic Electrocatalyst For 5-Hydroxymethylfurfural to 2,5-Bis-hydroxymethylfuran Selective Electrochemical Conversion**

**Figure S1.** Schematic of co-sputtering set-up for CuNi sample preparation.


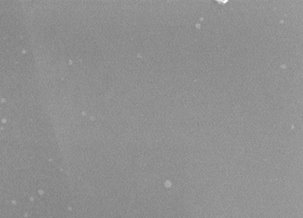


**Figure S2.** SEM image of pristine polished Cu. Scale bar on SEM images is 250 nm.

**Table S1.** Composition of the as-prepared sputtered catalysts.

|  | **Sample** | **Cu at%** | **Ni at%** |
| --- | --- | --- | --- |
| 1. | Cu | 100 | 0 |
| 2. | Cu98_3Ni1_7 | 26.675 | 0.4725 |
| 3. | Cu88Ni12 | 15.58 | 2.133333 |
| 4. | Cu64Ni36 | 6.86 | 3.8633 |
| 5. | Ni | 0 | 100 |

**Figure S3.** X-ray photoelectron spectroscopy (XPS) survey scan spectrum of Cu.

**Figure S4.** XPS survey scan spectrum of Cu98.3Ni1.7.

**Figure S5.** XPS survey scan spectrum of Cu88Ni12.

**Figure S6.** XPS survey scan spectrum of Cu64Ni36.

**Figure S7.** XPS survey scan spectrum of Ni.

**Figure S8.** Two compartment electrochemical cell: (A) Schematic and (B) experimental cell.

**
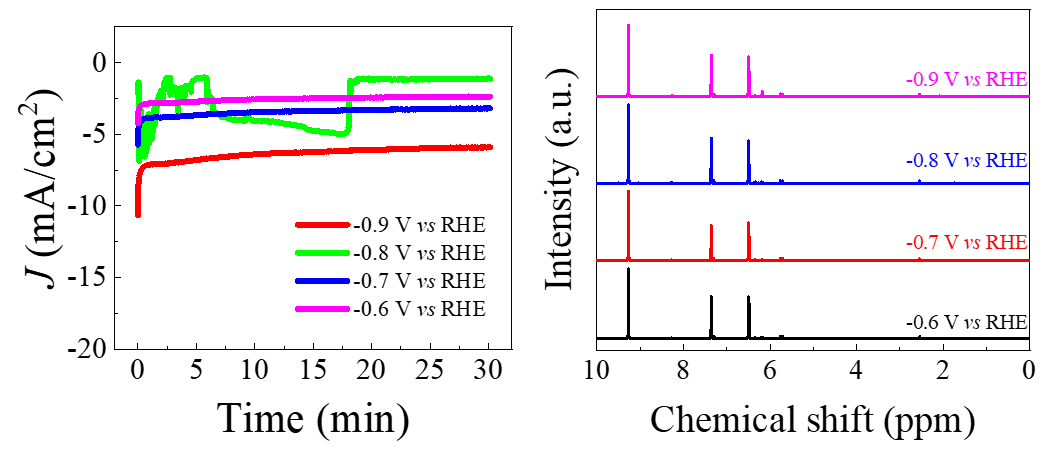
**

**Figure S9.** Ni catalyst: Chronoamperometry experiments and corresponding NMR analysis.


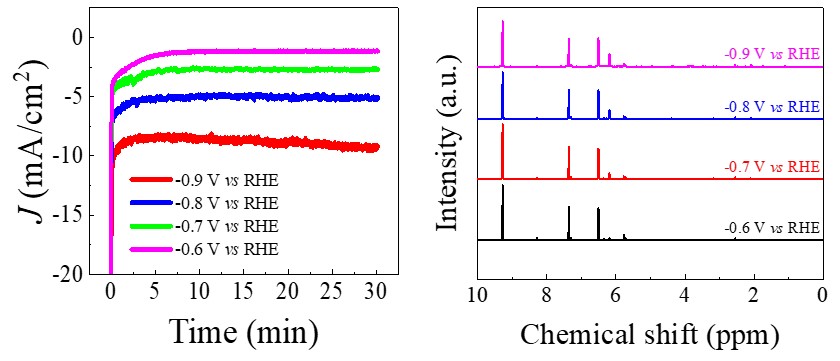


**Figure S10.** Cu64Ni36 catalyst: Chronoamperometry experiments and corresponding NMR analysis.


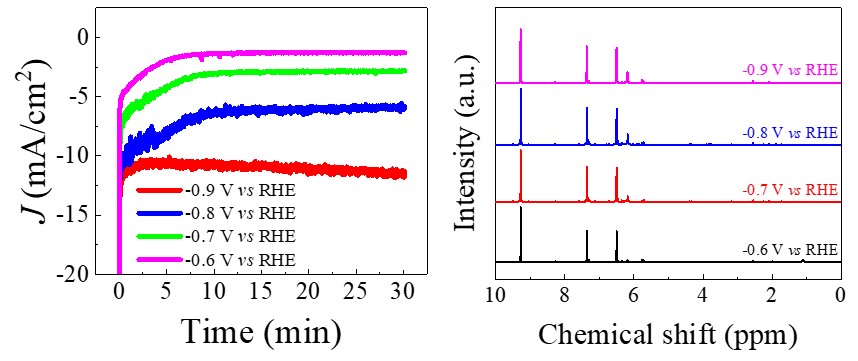


**Figure S11.** Cu88Ni12 catalyst: Chronoamperometry experiments and corresponding NMR analysis.


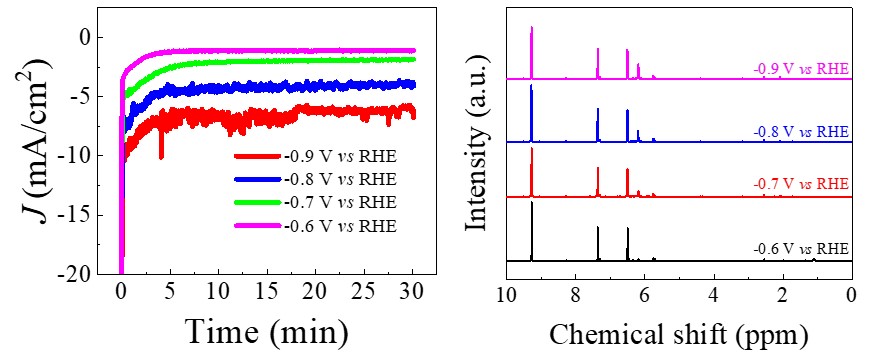


**Figure S12.** Cu98.3Ni1.7 catalyst: Chronoamperometry experiments and corresponding NMR analysis.

**
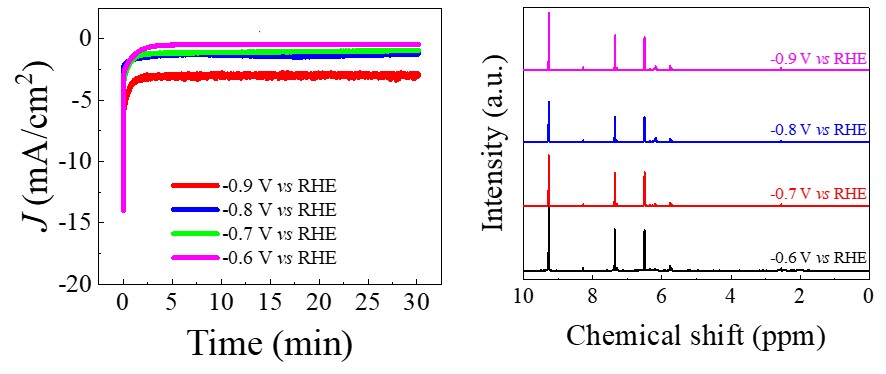
**

**Figure S13.** Cu catalyst: Chronoamperometry experiments and corresponding NMR analysis.

**Figure S14.** Ratio of NMR peaks; A2 (associated to BHMF) to A (associated to HMF) NMR peaks for (A) **(A)** Ni, **(B)** Cu64Ni36, **(C)** Cu88Ni12, **(D)** Cu98.3Ni1.7 thin films, and **(E)** Cu foil and (F) comparison of peaks recorded at 0.9V vs RHE for all catalysts.

**Figure S15.** Representative NMR data of the products collected at 0.9 V vs RHE for different catalysts.

**Hydroegn Faradaic Efficiency Calculation**

Calculation of Faradaic Efficiency (%) of H2:

eOutput = No. of moles of electrons required for reducing CO2 to H2

= 2* H2 moles produced

eInput = I (A) * t /(6.022*1023*1.602*10-19)

I (A) = recorded current in amp

t (s) = the time required to fill the sampling loop= V/r/60

V= volume of sampling loop (cm3)

r = recorded flow rate (sccm) = r/60 (cm3/s)

Faradaic efficiency = Output/input *100%

Similary the BHMF FEs were calculated using NMR calibration curve.


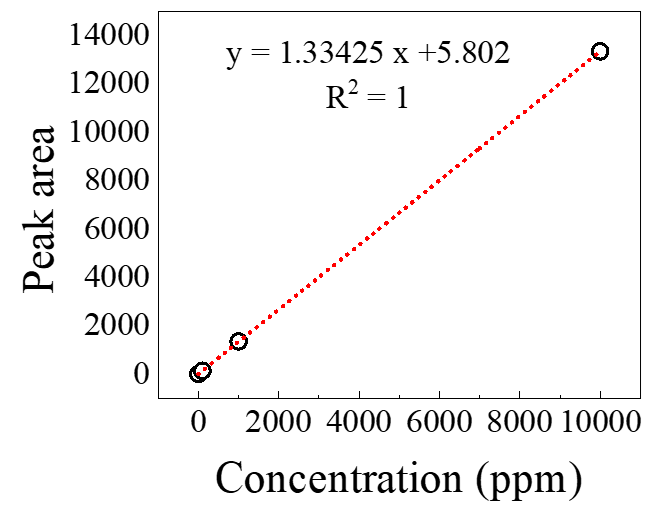


**Figure S16.** The provided figure represents a hydrogen calibration graph obtained via plotting the hydrogen concentration (or amount) and the corresponding detector response (peak area) in gas chromatography.

**
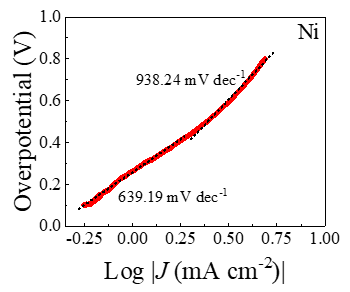
**

**Figure S17.** Tafel slop for Ni Catalyst in electrolyte without HMF..

**
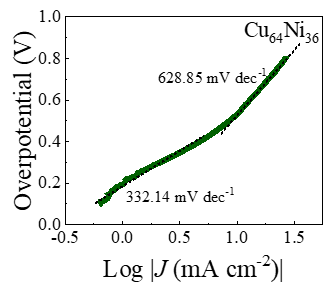
**

**Figure S18.** Tafel slop for Cu64Ni36 catalyst in electrolyte without HMF.

**
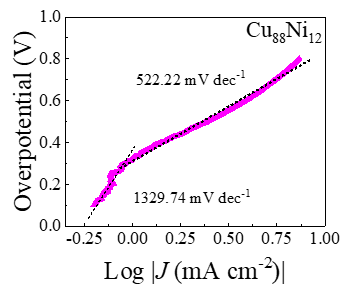
**

**Figure S19.** Tafel slop for Cu88Ni12 catalyst in electrolyte without HMF.

**
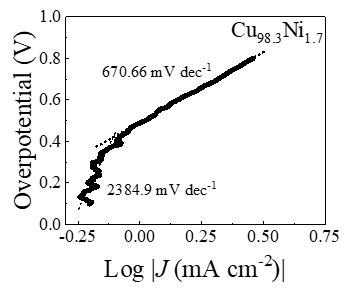
**

**Figure S20.** Tafel slop for Cu98.3Ni1.7 catalyst in electrolyte without HMF.

**
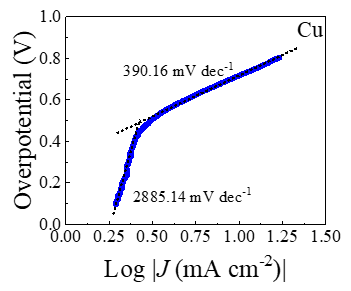
**

**Figure S21.** Tafel slop for Cu catalyst in electrolyte without HMF.

**Table S2.** Tafel slop analysis of the catalysts in electrolyte without HMF.

| **​** | **Tafel slope mV/dec)​** | |
| --- | --- | --- |
| **​** | **Lower potential​** | **Higher potential​** |
| **Cu​** | **2885.14​** | **390.16​** |
| **Cu98.3Ni1.7​** | **2384.9​** | **670.66​** |
| **Cu88Ni12​** | **1329.74​** | **522.22​** |
| **Cu64Ni36​** | **332.14​** | **628.85​** |
| **Ni​** | **639.19​** | **938.24​** |
